# Supplementary material
Source: MDPI journal article supplement (https://www.mdpi.com/1424-2818/15/6/767)
Supplement: s1 [file s1]

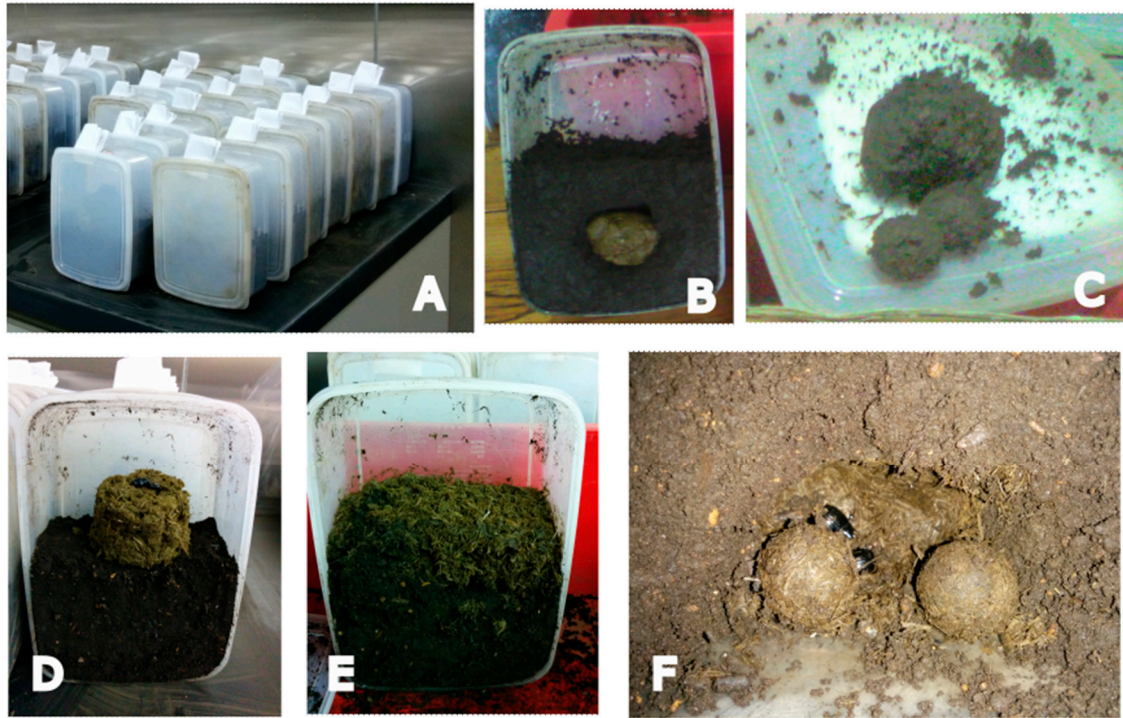

**Figure S1.** View of breeding experiments: (A) the arranged containers for breeding; (B) an artificial dung mass set in an artificially dug hole in the soil; (C) two brood balls and the remaining dung mass; (D) a container half filled with soil and the 250 mL of fresh dung given to each pair; (E) residual dung on the soil; (F) two brood balls and parent beetles in a nest.
