# Supplementary material
Source: MDPI journal article supplement (https://www.mdpi.com/1424-2818/15/6/767)
Supplement: s1 [file s1]

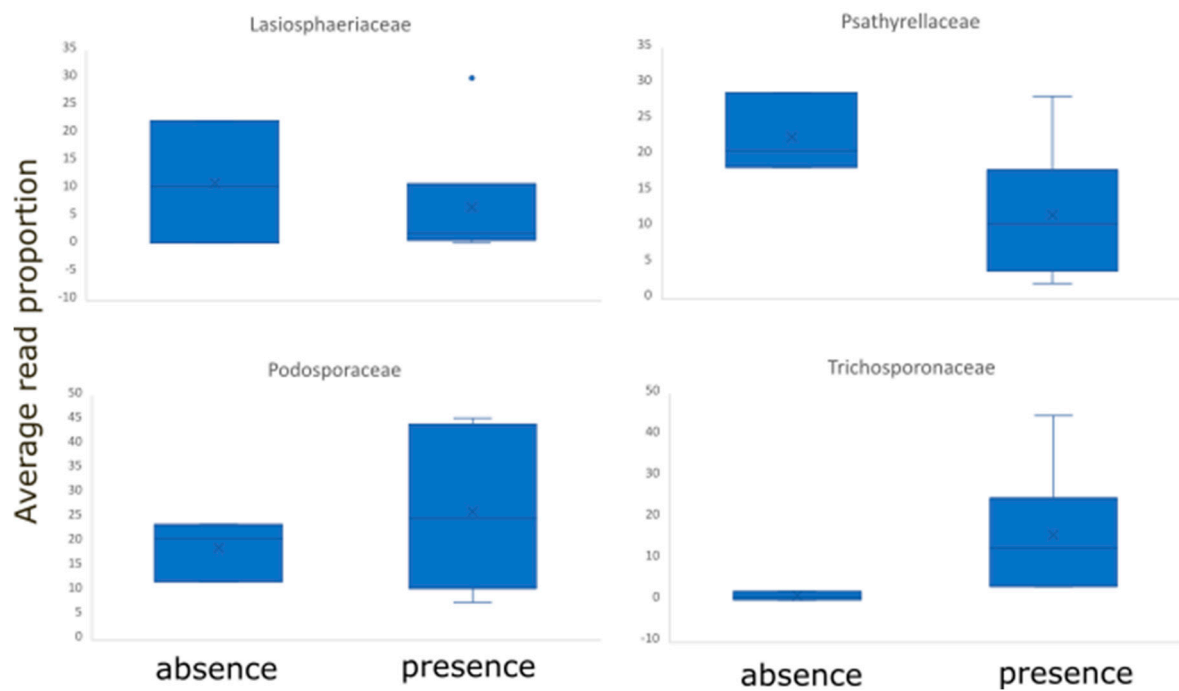

**Figure S2.** Comparison of the average read proportion for each family between the absence and presence of processing by the females.
